# Supplementary material for: Restoration of Hepatic and Intestinal Integrity by Phyllanthus amarus Is Dependent on Bax/Caspase 3 Modulation in Intestinal Ischemia-/Reperfusion-Induced Injury
Source: MDPI journal article supplement (doi:10.3390/molecules27165073), 2022-08-09
Supplement: s1 [file s1]

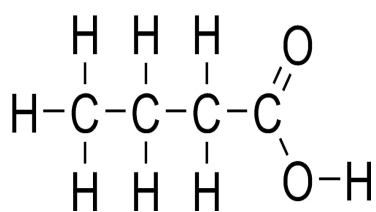

**Butanoic**

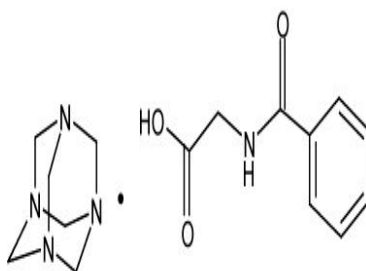

**Methenamine**

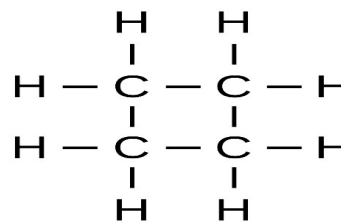

**Cyclobutane**

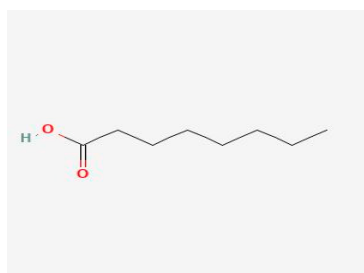

**Octanoic Acid**

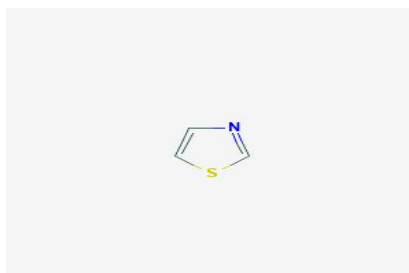

**Thiazole**

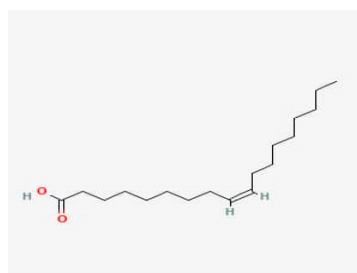

**Oleic Acid**

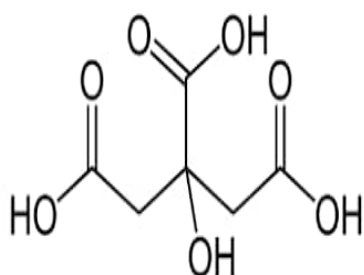

**Citric Acid**

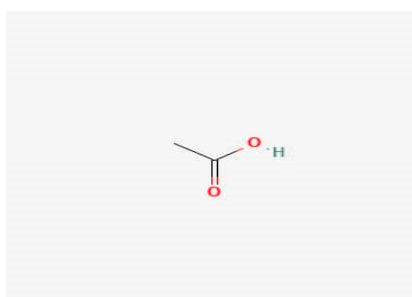

**Acetic Acid**

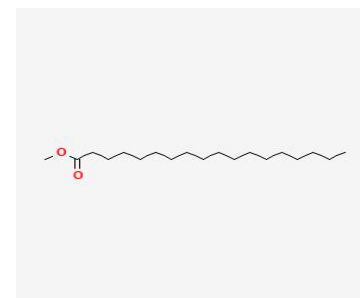

**Hexadecanoic acid**

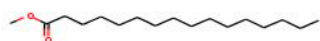

**Methyl stearate**

Supplementary Figure S1. Chemical structures of the Organic constituents of methanolic *P. Amarus* leaf extract

Supplementary Table S1. Intestinal histomorphometric analysis using Chiu's grading

| Grade | Features                                                                                                                 |
|-------|--------------------------------------------------------------------------------------------------------------------------|
| 0     | Normal mucosal villi.                                                                                                    |
| 1     | Development of subepithelial Gruenhagen's space, usually at the apex of the villus; often with capillary congestion.     |
| 2     | Extension of the subepithelial space with moderate lifting of epithelial layer from the lamina propria.                  |
| 3     | Massive epithelial lifting down the sides of villi. A few tips may be denuded.                                           |
| 4     | Denuded villi with lamina propria and dilated capillaries exposed. Increased cellularity of lamina propria may be noted. |
| 5     | Digestion and disintegration of lamina propria; hemorrhage and ulceration.                                               |

Supplementary Table S2. Hepatic histomorphometric analysis using Eckhoff's grading

| Grade | Features                                                                                                                                                              |
|-------|-----------------------------------------------------------------------------------------------------------------------------------------------------------------------|
| 0     | Minimal or no evidence of injury                                                                                                                                      |
| 1     | Mild injury consisting of cytoplasmic vacuolation and focal nuclear pyknosis                                                                                          |
| 2     | Moderate to severe injury with extensive nuclear pyknosis, cytoplasmic hypereosinophilia, loss of intercellular borders, and mild to moderate neutrophil infiltration |
| 3     | Severe injury with disintegration of hepatic cords, hemorrhage, and severe PMN infiltration                                                                           |
